# Supplementary material
Source: PubMed Central journal article supplement (PMC8063867)
Supplement: NIHMS1689556-supplement-Sup_Figs.pdf [file NIHMS1689556-supplement-Sup_Figs.pdf]

**Comparative Analysis of Quantitative Mass Spectrometric Methods for Subcellular Proteomics**

Abla Tannous, Marielle Boonen, Haiyan Zheng, Caifeng Zhao, Colin Germain, Dirk Moore, David Sleat, Michel Jadot, Peter Lobel

SUPPLEMENTAL FIGURES

Fig. S1. Distribution of precursors with weighted idotp.

Fig. S2-S4. PCA analysis of peptides using all four quantitative proteomics methods.

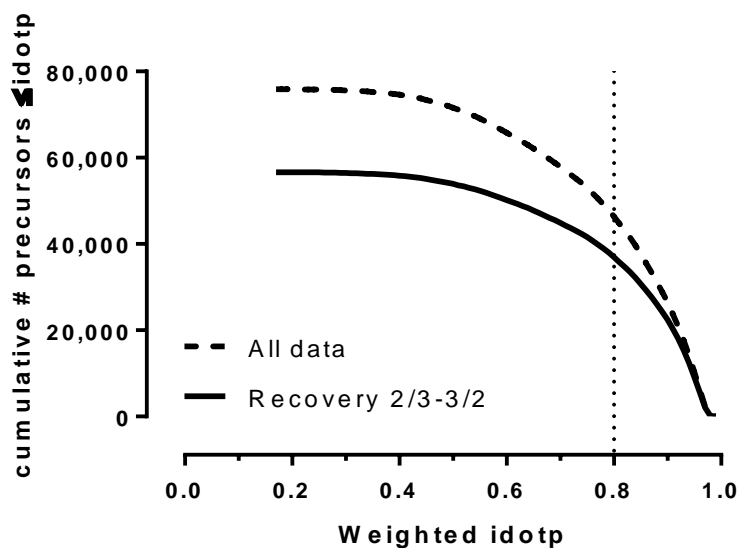

**Fig. S1. Distribution of precursors with weighted idotp.** Weighted idotp is defined as:  $\frac{\sum (\text{idotp} \times \text{intensity})}{\sum (\text{precursor intensities in all runs})}$  of precursor per run. Solid line plot represents precursors with acceptable recoveries while dashed line plot includes all recoveries. Vertical dashed line represents the acceptable weighted idotp threshold of 0.8.

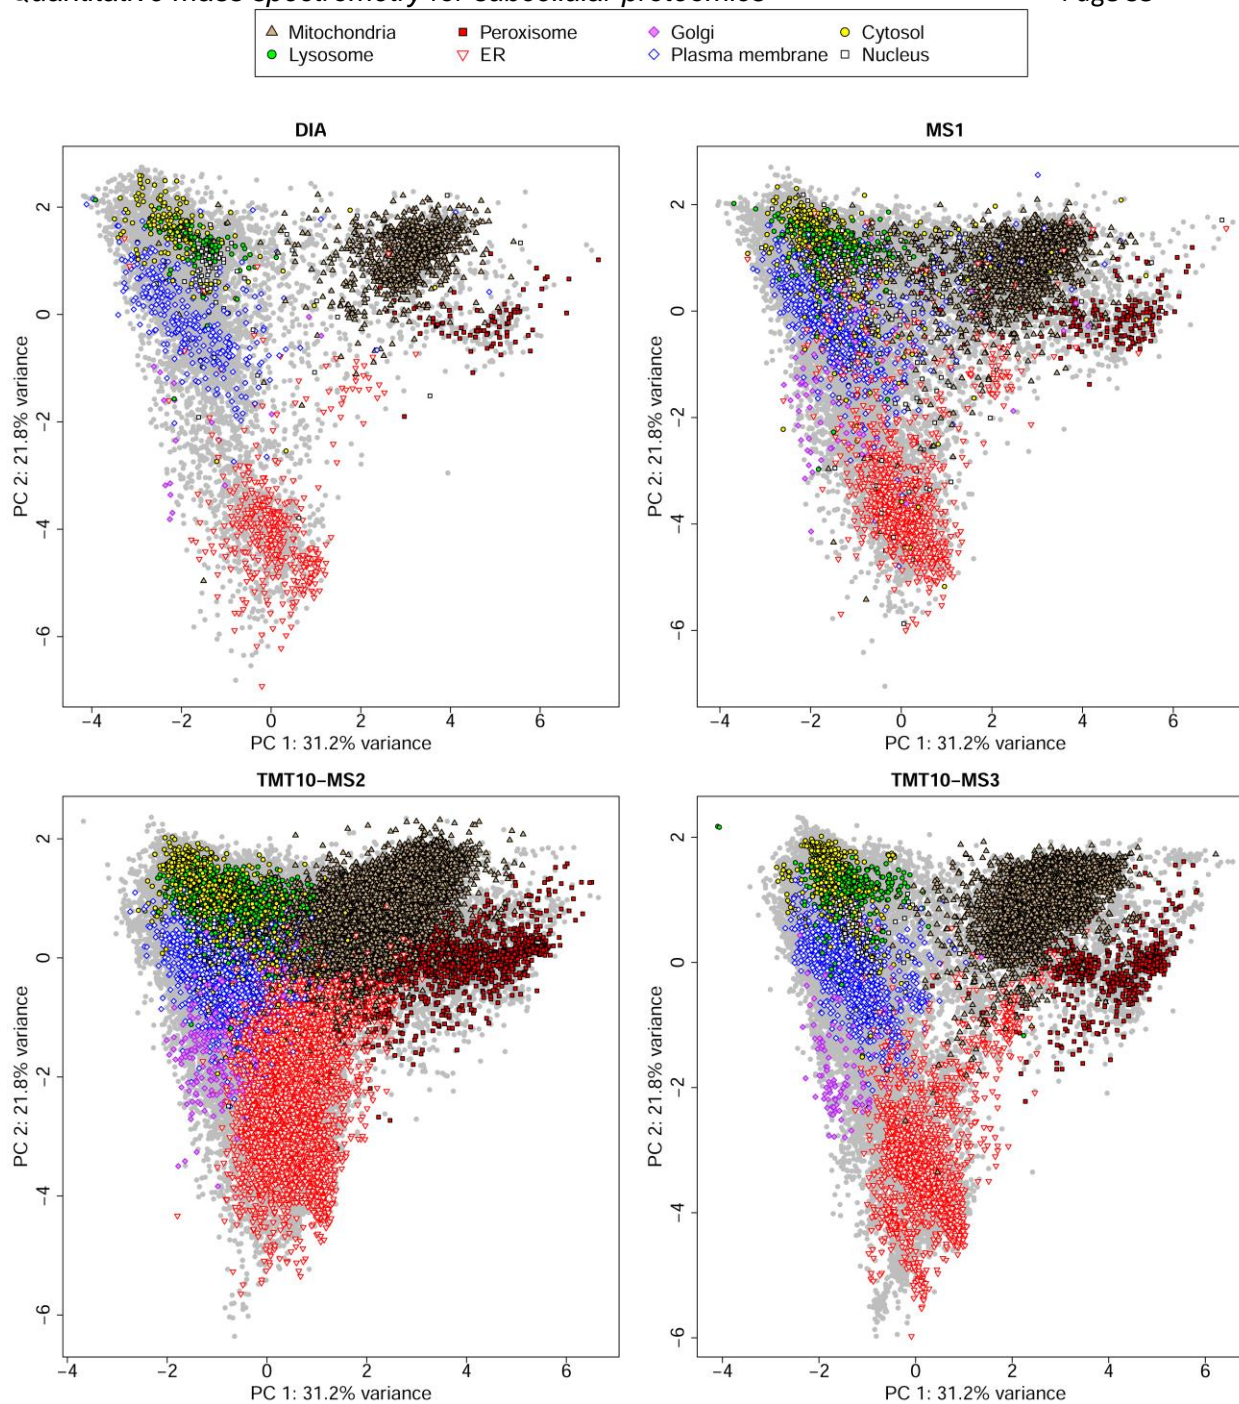

**Fig. S2. Principal component 1 versus 2 of peptides obtained using the four different quantitative MS approaches.** Peptides are assigned to organelles as indicated by color – unassigned peptides are indicated in grey.

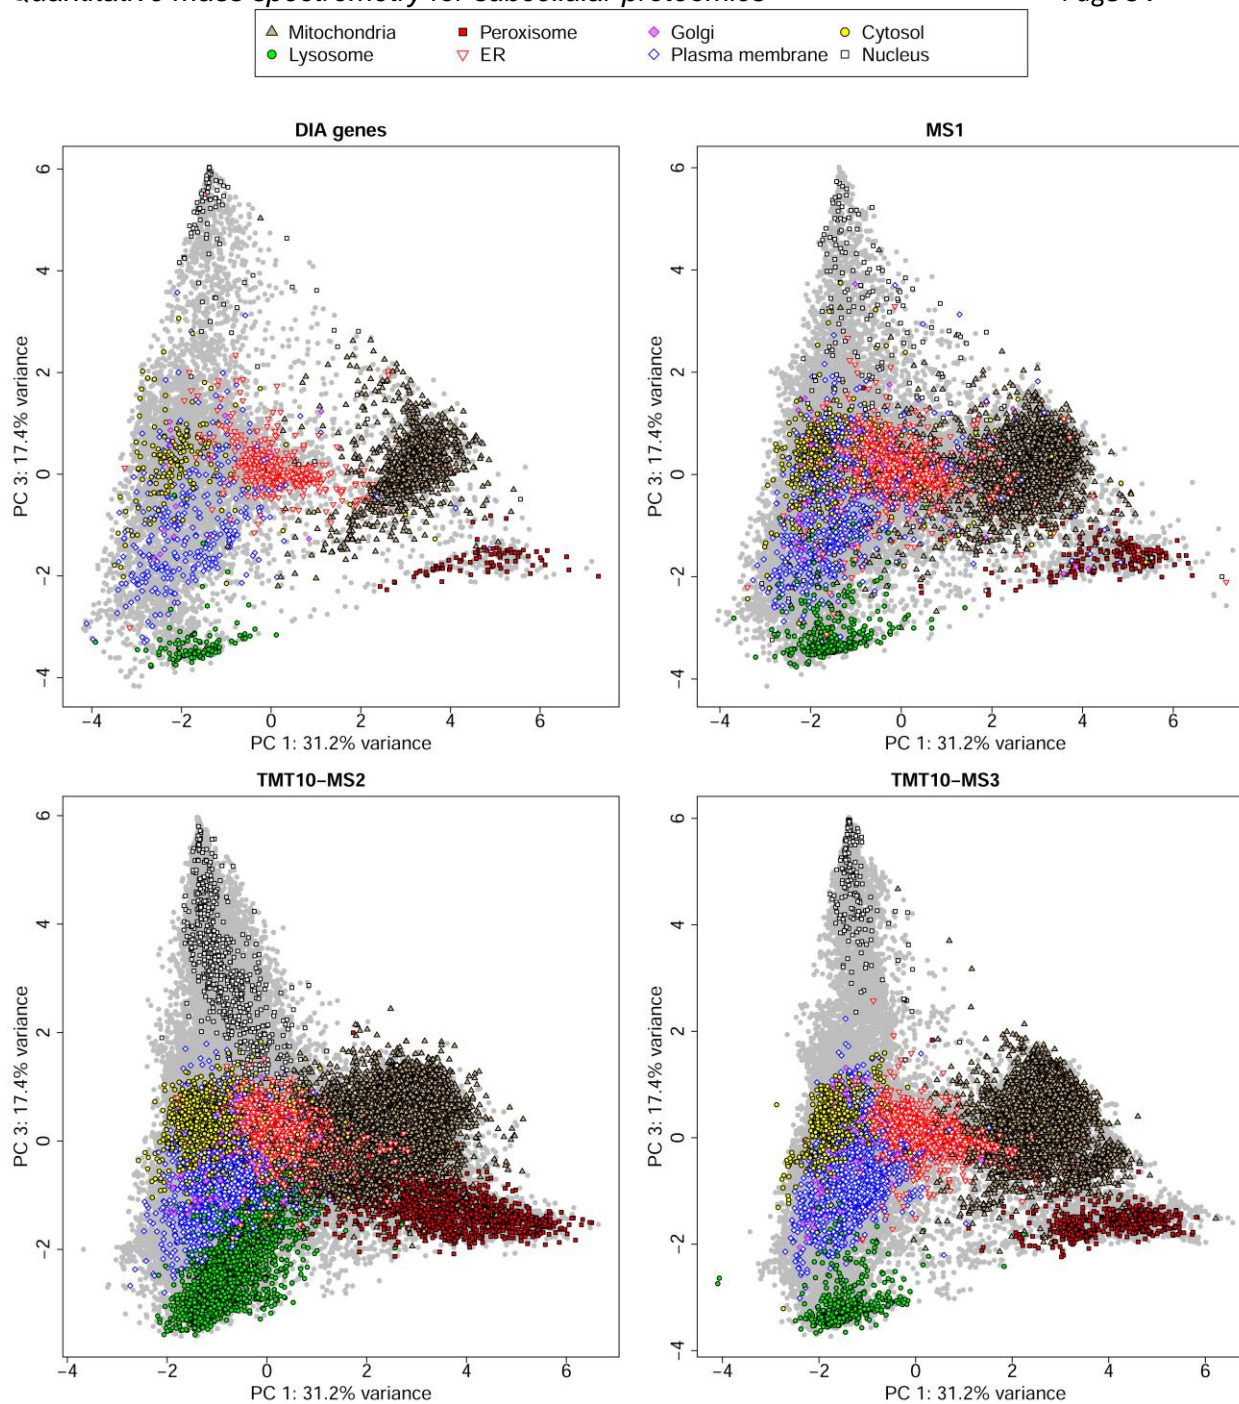

**Fig. S3. Principal component 1 versus 3 of peptides obtained using the four different quantitative MS approaches.** Peptides are assigned to organelles as indicated by color – unassigned peptides are indicated in grey.

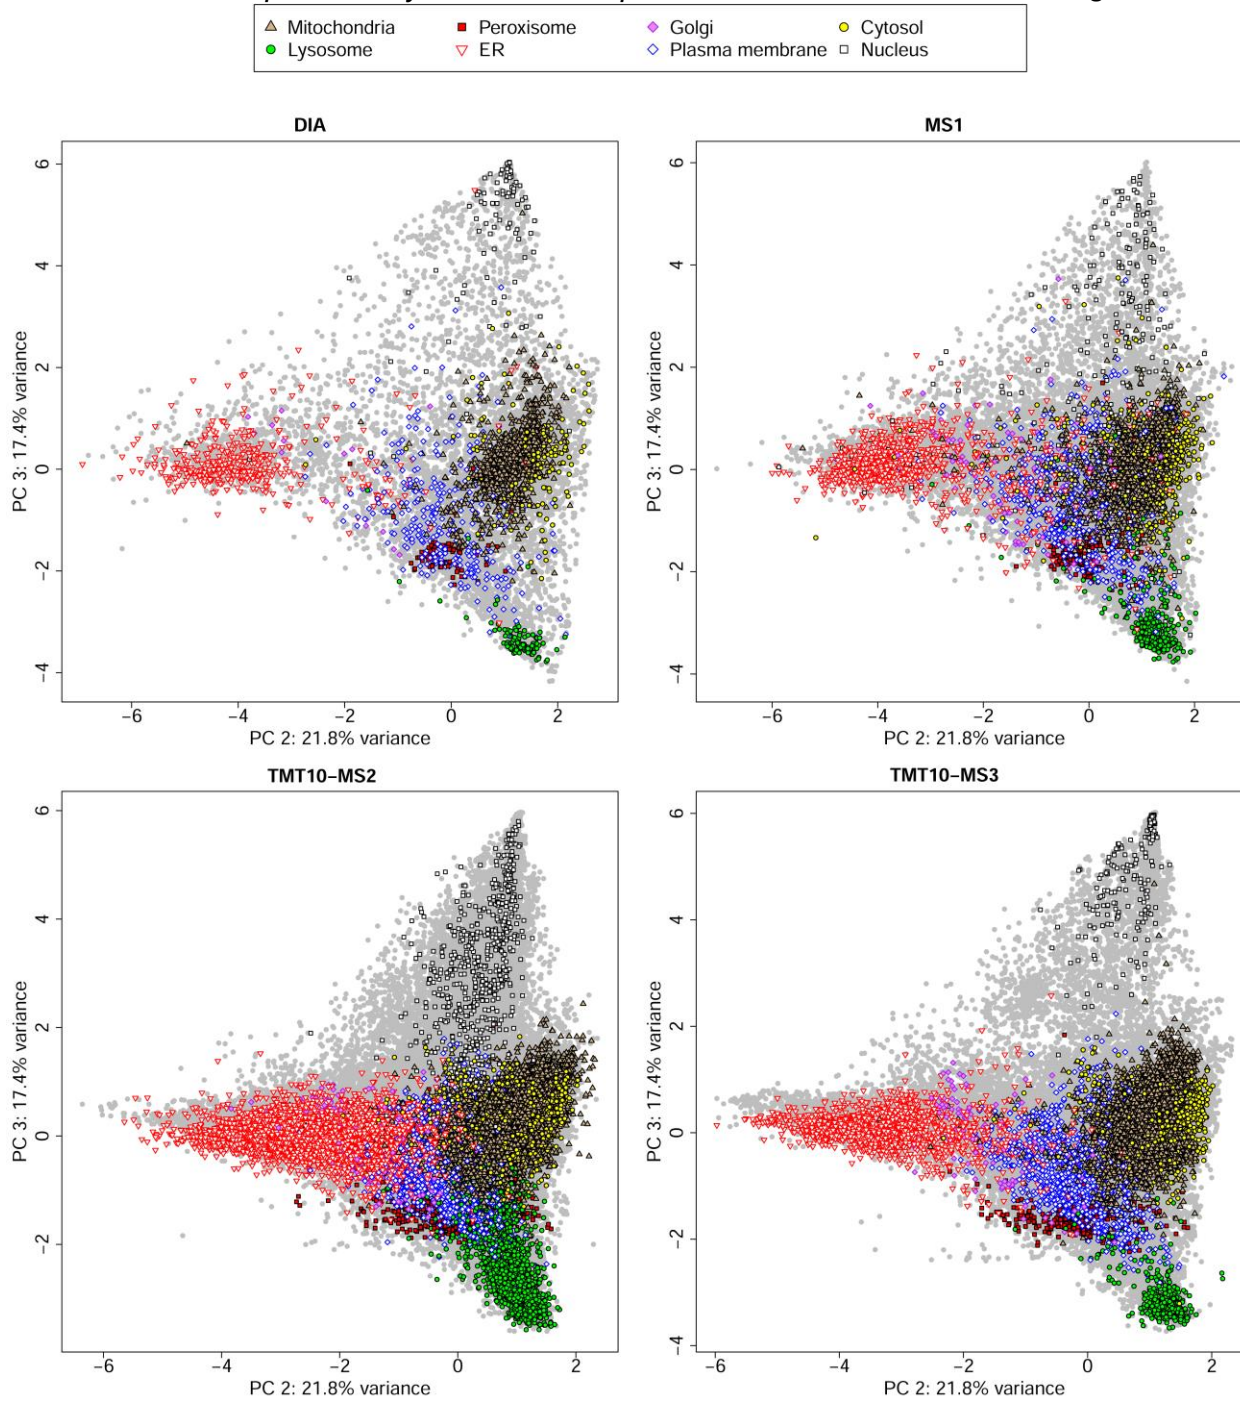

**Fig. S4. Principal component 2 versus 3 of peptides obtained using the four different quantitative MS approaches.** Peptides are assigned to organelles as indicated by color – unassigned peptides are indicated in grey.
